# Supplementary material for: Comparative genomic study of ALDH gene superfamily in Gossypium: A focus on Gossypium hirsutum under salt stress
Source: PLoS One. 2017 May 10;12(5):e0176733. doi: 10.1371/journal.pone.0176733 (PMC5425181; doi:10.1371/journal.pone.0176733)
Supplement: S2 Table — (XLSX) [file pone.0176733.s004.xlsx]

## Sheet: Sheet1
S2 Table.The information of ALDH genes in Gossypium.
G. arboreum	Gene identifier	G. hirsutum A subgenome	Gene identifier	G. barbadense A subgenome	Gene identifier	G. raimondii	Gene identifier	G. hirsutum D subgenome	Gene identifier	G. barbadense D subgenome	Gene identifier
GaALDH2B1	Cotton_A_28874	GhALDH2B1A	Gh_A03G1229	GbALDH2B1A	GOBAR_AA34298	GrALDH2B1	Gorai.001G261100.1	GhALDH2B1D	Gh_D02G1665	GbALDH2B1D	GOBAR_DD13834
GaALDH2B2	Cotton_A_32613	GhALDH2B2A	Gh_A07G2011	GbALDH2B2A	GOBAR_AA16017	GrALDH2B2	Gorai.005G183300.1	GhALDH2B2D	Gh_D07G2232	GbALDH2B2D	GOBAR_DD36126
GaALDH2B3	Cotton_A_23038	GhALDH2B3A	Gh_A12G1314	GbALDH2B3A	GOBAR_AA15538	GrALDH2B3	Gorai.008G158500.1	GhALDH2B3D	Gh_D12G1438	GbALDH2B3D	GOBAR_DD04569
GaALDH2B4	Cotton_A_01478	GhALDH2B4A	Gh_A12G2471			GrALDH2B4	Gorai.008G294300.1	GhALDH2B4D	Gh_D12G2599	GbALDH2B4D	GOBAR_DD32891
GaALDH2C1	Cotton_A_10367	GhALDH2C1A	Gh_A05G0157	GbALDH2C1A	GOBAR_AA23540	GrALDH2C1	Gorai.001G004300.1	GhALDH2C1D	Gh_D05G0221	GbALDH2C1D	GOBAR_DD29151
GaALDH2C2	Cotton_A_10366	GhALDH2C2A	Gh_A06G0526	GbALDH2C2A	GOBAR_AA10459	GrALDH2C2	Gorai.001G004400.1	GhALDH2C2D	Gh_D06G0580	GbALDH2C2D	GOBAR_DD30141
GaALDH2C3	Cotton_A_20457	GhALDH2C3A	Gh_A07G0063	GbALDH2C3A	GOBAR_AA22702	GrALDH2C3	Gorai.009G024000.1	GhALDH2C3D	Gh_D07G0046	GbALDH2C3D	GOBAR_DD36647
GaALDH2C4	Cotton_A_11147			GbALDH2C4A	GOBAR_AA22703	GrALDH2C4	Gorai.010G069600.1	GhALDH2C4D	Gh_D07G0047	GbALDH2C4D	GOBAR_DD36648
GaALDH3F1	Cotton_A_01580	GhALDH3F1A	Gh_A02G1616	GbALDH3F1A	GOBAR_AA23354	GrALDH3F1	Gorai.003G011600.1	GhALDH3F1D	Gh_D03G0106	GbALDH3F1D	GOBAR_DD21071
GaALDH3F2	Cotton_A_01068	GhALDH3F2A	Gh_A05G0568	GbALDH3F2A	GOBAR_AA30653	GrALDH3F2	Gorai.009G072900.1	GhALDH3F2D	Gh_D05G0697	GbALDH3F2D	GOBAR_DD20704
GaALDH3H1	Cotton_A_16298	GhALDH3H1A	Gh_A02G0751	GbALDH3H1A	GOBAR_AA27134	GrALDH3H1	Gorai.005G089100.1	GhALDH3H1D	Gh_D02G0793	GbALDH3H1D	GOBAR_DD05358
GaALDH3H2	Cotton_A_16086	GhALDH3H2A	Gh_A05G3716	GbALDH3H2A	GOBAR_AA29782	GrALDH3H2	Gorai.009G247000.1	GhALDH3H2D	Gh_D05G2245	GbALDH3H2D	GOBAR_DD02215
		GhALDH3H3A	Gh_A06G0384			GrALDH3H3	Gorai.010G051500.1	GhALDH3H3D	Gh_D06G0414	GbALDH3H3D	GOBAR_DD34246
GaLDH3I1	Cotton_A_25453	GhALDH3I1A	Gh_A05G3311	GbALDH3I1A	GOBAR_AA25925	GrALDH3I1	Gorai.012G037500.1	GhALDH3I1D	Gh_D04G0292	GbALDH3I1D	GOBAR_DD03064
GaALDH5F1	Cotton_A_12712	GhALDH5F1A	Gh_A01G0799	GbALDH5F1A	GOBAR_AA04274	GrALDH5F1	Gorai.002G110500.1	GhALDH5F1D	Gh_D01G0827	GbALDH5F1D	GOBAR_DD13905
GaALDH6B1	Cotton_A_20834	GhALDH6B1A	Gh_A03G1560	GbALDH6B1A	GOBAR_AA29984	GrALDH6B1	Gorai.005G226800.1	GhALDH6B1D	Gh_D02G2009	GbALDH6B1D	GOBAR_DD17313
GaALDH6B2	Cotton_A_20835	GhALDH6B2A	Gh_A03G1561	GbALDH6B2A	GOBAR_AA29985	GrALDH6B2	Gorai.005G226900.1	GhALDH6B2D	Gh_D02G2010	GbALDH6B2D	GOBAR_DD07683
GaALDH6B3	Cotton_A_06438	GhALDH6B3A	Gh_A10G0793	GbALDH6B3A	GOBAR_AA29986	GrALDH6B3	Gorai.011G109400.1	GhALDH6B3D	Gh_D10G0970
GaALDH6B4	Cotton_A_17210			GbALDH6B4A	GOBAR_AA15688
GaALDH7B1	Cotton_A_28079			GbALDH7B1A	GOBAR_AA02925	GrALDH7B1	Gorai.010G174800.1	GhALDH7B1D	Gh_D06G1578	GbALDH7B1D	GOBAR_DD00172
GaALDH10A1	Cotton_A_01980	GhALDH10A1A	Gh_A07G0563	GbALDH10A1A	GOBAR_AA01191	GrALDH10A1	Gorai.001G071200.1	GhALDH10A1D	Gh_D07G0629	GbALDH10A1D	GOBAR_DD37797
GaALDH10A2	Cotton_A_02713	GhALDH10A2A	Gh_A11G0380	GbALDH10A2A	GOBAR_AA10035	GrALDH10A2	Gorai.007G047400.1	GhALDH10A2D	Gh_D11G0441	GbALDH10A2D	GOBAR_DD12724
										GbALDH10A3D	GOBAR_DD35609
GaALDH11A1	Cotton_A_07247	GhALDH11A1A	Gh_A05G0415	GbALDH11A1A	GOBAR_AA17649	GrALDH11A1	Gorai.001G031700.1	GhALDH11A1D	Gh_D05G0533	GbALDH11A1D	GOBAR_DD27383
GaALDH11A2	Cotton_A_01250	GhALDH11A2A	Gh_A05G0479	GbALDH11A2A	GOBAR_AA23173	GrALDH11A2	Gorai.009G055100.1	GhALDH11A2D	Gh_D05G0594	GbALDH11A2D	GOBAR_DD28634
GaALDH11A3	Cotton_A_01179	GhALDH11A3A	Gh_A07G0209			GrALDH11A3	Gorai.009G061700.1	GhALDH11A3D	Gh_D07G0263	GbALDH11A3D	GOBAR_DD06386
GaALDH12A1	Cotton_A_24784	GhALDH12A1A	Gh_A03G0575	GbALDH12A1A	GOBAR_AA25745	GrALDH12A1	Gorai.003G095000.1	GhALDH12A1D	Gh_D03G0856	GbALDH12A1D	GOBAR_DD38351
GaALDH18B1	Cotton_A_00386	GhALDH18B1A	Gh_A01G1899	GbALDH18B1A	GOBAR_AA33915	GrALDH18B1	Gorai.002G256200.1	GhALDH18B1D	Gh_D01G2158	GbALDH18B1D	GOBAR_DD02896
GaALDH18B2	Cotton_A_05563	GhALDH18B2A	Gh_A04G1396	GbALDH18B2A	GOBAR_AA04887	GrALDH18B2	Gorai.011G269700.1	GhALDH18B2D	Gh_D04G1204	GbALDH18B2D	GOBAR_DD20936
GaALDH18B3	Cotton_A_22680	GhALDH18B3A	Gh_A10G2010	GbALDH18B3A	GOBAR_AA08361	GrALDH18B3	Gorai.012G107700.1	GhALDH18B3D	Gh_D10G2321	GbALDH18B3D	GOBAR_DD30254
GaALDH18B4	Cotton_A_25103	GhALDH18B4A	Gh_A11G2925	GbALDH18B4A	GOBAR_AA34014	GrALDH18B4	Gorai.007G377200.1	GhALDH18B4D	Gh_D11G3311	GbALDH18B4D	GOBAR_DD21945
GaALDH22A1	Cotton_A_21780	GhALDH22A1A	Gh_A02G0527	GbALDH22A1A	GOBAR_AA37756	GrALDH22A1	Gorai.005G066700.1	GhALDH22A1D	Gh_D02G0592	GbALDH22A1D	GOBAR_DD03338
